# Supplementary material
Source: publisher site journal article supplement (https://www.dovepress.com/get_supplementary_file.php?f=282850.xlsx)
Supplement: Supplementary file 1 [file get_supplementary_file.php]

## Sheet: S-1 Ethics
Information about the ethics approval obtained from each participating hospital
	Hospital name	Principal investigator(s)	Name of committee	IRB permit number
1	Instituto Nacional de Ciencias Médicas y Nutrición "Dr. Salvador Zubirán"	Ana Lilia Garduño-López & Victor Manuel Acosta Nava	Comité de Ética en Investigación del Instituto Nacional de Ciencias Médicas y Nutrición Salvador Zubirán	05-001-09-23052016
2	Centro Médico Nacional Siglo XXI	Dulce María Rascón-Martínez	Comité Nacional de Investigación Científica, Instituto Mexicano del Seguro Social	R-2017-785-066 [*]
3	Instituto Nacional de Cancerología (INCAN)	Luis Felipe Cuellar-Guzmán	Estados Unidos Mexicanos, Secretaria de Salud, Comision Federal Para La Proteccion Contra Riegos Sanitarios Comision de Autorizacion Sanitaria	12CEI0901411
4	Hospital General Regional No. 2" Dr. Guillermo Fajardo Ortíz" IMSS (Villacoapa)	Maria Esther Flores-Villanueva	Comité Nacional de Investigación Científica, Instituto Mexicano del Seguro Social	R-2017-785-066 [*]
5	Clínica Integral de Cirugía para la Obesidad y Enfermedades Metabólicas, Hospital General "Dr. Ruben Leñero	Elizabeth Villegas-Sotelo	Dirección de Formación, Actualización Médica e Investigación. Comité de Ética en Investigación Nivel Central	2050100120
6	Hospital General de México “Dr. Eduardo Liceaga”	Orlando Carrillo-Torres	Comités de Ética en Investigación	DI/16/203/03/080
7	Unidad Médica de Alta Especialidad del Hospital de Traumatología y Ortopedia Lomas Verdes (IMSS)	Hugo Vilchis-Sámano	Comité Nacional de Investigación Científica, Instituto Mexicano del Seguro Social	R-2017-785-066 [*]
8	Fundación Médica Sur	Mariana Calderón-Vidal,	Comité de Ética en Investigación de Médica Sur, S.A.B. de C.V	01-2019-CEI-30
9	Instituto Nacional de Enfermedades Respiratorias (INER)	Gabriela Islas-Lagunas	Comité de Etica en Investigación del Instituto Nacional de Enfermedades Respiratorias “Ismael Cosio Villegas”	CONBIOETICA-09-CEI-003-20160427
	[*] These hospitals belong to the Mexican Social Security Institute (IMSS) . The request for ethics approval was submitted jointly to a single national committee.

## Sheet: S-2 Missings 
The table provides information about missing data for the patient reported outcomes and process variables described in the study
	phase: 1							phase: 2							total
variable	median	Q1	Q3	min	max	total: n	total: %	median	Q1	Q3	min	max	total: n	total: %	median	Q1	Q3	min	max	total: n	total: %
worst pain ≥ 6	0	0	0	0	0	0	0	0	0	0	0	0	0	0	0	0	0	0	0	0	0
Intefer_pain_activity_bed ≥ 4	0	0	0	0	2.5641	4	0.292398	0	0	0	0	1.49254	2	0.155039	0	0	0.339559	0	1.5873	6	0.225734
Side_Effect_Nausea ≥ 4	0	0	1.04167	0	1.62602	6	0.438596	0	0	0	0	1.21951	2	0.155039	0	0	0.671141	0	0.793651	8	0.300978
Time_severe_pain ≥ 30%	0	0	0	0	1.45985	3	0.219298	0	0	0.609756	0	2	5	0.387597	0	0	0.537634	0	0.775194	8	0.300978
Intefer_pain_breath_cough ≥ 4	0	0	0	0	0.884956	2	0.146199	0	0	0	0	1.49254	1	0.0775194	0	0	0	0	0.537634	3	0.112867
Intefer_pain_sleep ≥ 4	0	0	0.840336	0	4.44444	6	0.438596	0	0	0	0	2	2	0.155039	0	0	0.746269	0	1.33333	8	0.300978
Intefer_pain_activity_outbed ≥ 4	40	24.7788	51.2195	6.20155	76.4706	578	42.2515	39.0244	16	61.2403	0	82.9268	505	39.1473	38.9262	25.1337	56.6667	4.30622	79.3478	1083	40.7449
Composite_score	0	0	0	0	1.45985	3	0.219298	0	0	0.609756	0	2	5	0.387597	0	0	0.537634	0	0.775194	8	0.300978
WishMoreTrt	1.19048	0	1.49254	0	8.33333	18	1.31579	0	0	0	0	1.25	3	0.232558	0.671141	0	0.793651	0	4.62428	21	0.790068
Percent_Relief	0.383142	0	1.28205	0	2.38095	9	0.657895	0	0	0	0	1.21951	3	0.232558	0.387597	0	0.671141	0	1.49254	12	0.451467
ReceivedTrtinfo	1.19048	0	1.62602	0	6.66667	19	1.38889	0	0	0.775194	0	2.08333	6	0.465116	0.775194	0	1.49254	0	2.89017	25	0.940557
painMeasured	2.98507	1.91571	9.23077	0	39.2857	97	7.09064	3.96341	0.826446	5.19481	0	12.1622	44	3.41085	3.10078	1.5873	7.18954	0.666667	26.1194	141	5.30474
Intra_op_wound_infiltration	0	0	1.53846	0	36.2832	57	4.16667	0	0	0	0	5.40541	5	0.387597	0.339559	0	0.793651	0	24.0642	62	2.33258
Non_pharmaceutical	1.28205	0	1.53846	0	6.25	16	1.16959	0	0	0.609756	0	2.98507	6	0.465116	0.746269	0.534759	1.07527	0	3.46821	22	0.82769
ward_non_opioids	0	0	0.840336	0	6.15385	10	0.730994	0	0	0	0	1.55039	3	0.232558	0	0	1.07527	0	2.61438	13	0.48909
ward_opioidsORLocal_Anaes	0.383142	0	1.45985	0	4.16667	16	1.16959	0	0	0	0	5.40541	6	0.465116	0.169779	0	1.16279	0	4.27807	22	0.82769
wardOPIOIDorLAs	0.383142	0	1.45985	0	4.16667	16	1.16959	0	0	0	0	5.40541	6	0.465116	0.169779	0	1.16279	0	4.27807	22	0.82769
wardOPIOIDsystemic	0.383142	0	1.45985	0	4.16667	16	1.16959	0	0	0	0	5.40541	6	0.465116	0.169779	0	1.16279	0	4.27807	22	0.82769
wardLocalAnaesthetic	0.383142	0	1.45985	0	4.16667	16	1.16959	0	0	0	0	5.40541	6	0.465116	0.169779	0	1.16279	0	4.27807	22	0.82769
wardOpioid&Non_opioid	0.775194	0	3.53982	0	6.15385	20	1.46199	0	0	0.826446	0	5.40541	8	0.620155	0.793651	0	2.23881	0	4.27807	28	1.05342
wardOpioid&Non_opioid	0.775194	0	3.53982	0	6.15385	20	1.46199	0	0	0.826446	0	5.40541	8	0.620155	0.793651	0	2.23881	0	4.27807	28	1.05342
intra_op_Regional_Anaes	0	0	0	0	4.16667	8	0.584795	0	0	0	0	1.49254	3	0.232558	0	0	0.653595	0	2.89017	11	0.413845
recoveryRegional_Anaes	0	0	1.04167	0	3.57143	8	0.584795	0	0	0	0	0.952381	1	0.0775194	0.396825	0	0.653595	0	2.23881	9	0.3386
wardRegional_Anaes	0	0	0.840336	0	3.53982	12	0.877193	0	0	0.952381	0	5.40541	9	0.697674	0.666667	0	1.49254	0	4.27807	21	0.790068
age	0	0	1.96078	0	4.7619	13	0.950292	0.304878	0	1.90476	0	2.5	9	0.697674	1.07527	0	1.33333	0	3.73134	22	0.82769
d1Gender	0	0	0.884956	0	4.16667	7	0.511696	0.304878	0	1.21951	0	2.5	8	0.620155	0.653595	0.169779	0.793651	0	2.31214	15	0.564334
comorb_related_to_pain	0	0	0	0	1.19048	1	0.0730994	0	0	0	0	2.43902	3	0.232558	0	0	0.478469	0	1.08696	4	0.150489
Opioid_before_admission	0	0	4.7619	0	17.7083	39	2.85088	0	0	1.21951	0	2.5	10	0.775194	0.793651	0	2.98507	0	9.82659	49	1.84349
Chronic_pain_before_addmission	0	0	1.45985	0	5.20833	11	0.804094	0	0	1.21951	0	5.40541	8	0.620155	0.537634	0	0.775194	0	2.89017	19	0.714823
ICD9_surgical_code	0	0	0	0	0	0	0	0	0	0	0	0	0	0	0	0	0	0	0	0	0
duration_surgery	7.31707	1.28205	8.84956	0	23.9583	84	6.14035	1.49254	0.775194	2.5974	0	4.7619	25	1.93798	3.96825	2.03735	5.22876	1.5873	14.4509	109	4.10083
Time_to_survey	29.4118	9.7561	79.1045	4.44444	93.8697	638	46.6374	13.4328	9.09091	24.0854	2.43902	54	229	17.7519	17.3913	12	48.9933	8.61244	78.3582	867	32.6185

## Sheet: S-3 Non-pharmacological interv 
Non-pharmacological interventions used by patients or received from staff in both phases of the study
	Non-pharmaceutical treatment on the ward
	Project phase 1									Project phase 2
	mean	SD	lowerCI	upperCI	median	Q1	Q3	min	max	mean	SD	lowerCI	upperCI	median	Q1	Q3	min	max
Non-pharmaceutical: overall	20.8904	6.95008	16.6905	25.0902	18.9781	14.2857	26.1538	11.9403	31.7829	19.9985	17.3349	9.5231	30.4739	17.3554	8.95522	24.3902	1.13636	63.75
distraction	18.7752	7.92501	13.9862	23.5642	16.4751	11.5385	26.1538	9.73451	31.3725	16.5697	16.2918	6.72461	26.4147	14.0496	8.95522	20.7317	1.13636	63.75
cold pack	2.07785	3.14194	0.179193	3.9765	0.766284	0	2.43902	0	10.2564	5.40999	10.3344	-0.83503	11.655	0.304878	0	3.65854	0	29.1667
massage	2.67835	2.48508	1.17663	4.18007	1.55039	1.19048	3.25203	0	8.75912	1.90747	1.86008	0.783429	3.0315	1.49254	0	2.5	0	5.78512
heat pack	1.78554	1.73897	0.734686	2.83639	1.91571	0	2.5641	0	5.10949	1.12057	1.34721	0.306453	1.93468	0.775194	0	2	0	4.13223
other	0.618614	1.31679	-0.177115	1.41434	0	0	0.729927	0	4.7619	0.465134	0.903711	-0.0809729	1.01124	0	0	0	0	2.43902
accupuncture	0.409387	0.648588	0.0174496	0.801325	0	0	1.04167	0	1.53846	0.25588	0.711913	-0.174324	0.686085	0	0	0	0	2.5
TENS	0.161158	0.404866	-0.0834999	0.405817	0	0	0	0	1.28205	0.117261	0.341737	-0.0892488	0.32377	0	0	0	0	1.21951

## Sheet: S-4 Regression 
This table and the next provide details about the regression models used in the study.
	patient reported outcomes
	project phase [phase 2]				intercept				age (z-scaled)				gender [male]				pre-existing pain [yes]					Predicted Risk
variable	RR	lowerCI	upperCI	p	RR	lowerCI	upperCI	p	RR	lowerCI	upperCI	p	RR	lowerCI	upperCI	p	RR	lowerCI	upperCI	p	n	phase 1	phase 2	difference
worst pain ≥ 6	0.693997	0.533821	0.902234	0.00636323	0.530867	0.45324	0.621788	4.10783e-15	0.932446	0.876744	0.991687	0.0260404	0.870986	0.822237	0.922625	2.59564e-06	1.21271	1.08382	1.35693	0.000768261	2567	0.550838	0.377248	-0.173589
Time_severe_pain ≥ 30%	0.603765	0.480382	0.758838	1.51781e-05	0.592138	0.530543	0.660885	0	0.945312	0.900962	0.991846	0.0217921	0.953202	0.900896	1.00854	0.0960102	1.15887	1.0408	1.29033	0.00715992	2559	0.62226	0.371617	-0.250643
Intefer_pain_activity_bed ≥ 4	0.632269	0.508543	0.786097	3.68793e-05	0.498053	0.42604	0.58224	0	0.946397	0.897786	0.99764	0.0405762	0.890327	0.7824	1.01314	0.0780747	1.23993	1.10314	1.39367	0.000310953	2561	0.526036	0.328118	-0.197918
Intefer_pain_breath_cough ≥ 4	0.669134	0.51038	0.877268	0.00364164	0.363288	0.293375	0.449862	0	0.879601	0.811816	0.953047	0.00171636	0.885959	0.757009	1.03687	0.131352	1.21778	1.0565	1.40368	0.00656302	2564	0.383094	0.251539	-0.131555
Intefer_pain_sleep ≥ 4	0.601409	0.473921	0.763193	2.87242e-05	0.272837	0.226821	0.328189	0	0.922242	0.862635	0.985968	0.0175716	0.942219	0.86978	1.02069	0.144783	1.44514	1.28389	1.62663	1.06051e-09	2559	0.318654	0.187126	-0.131529
Composite	0.606861	0.462676	0.795978	0.000307773	0.421294	0.349721	0.507515	0	0.911149	0.844605	0.982937	0.0161817	0.857163	0.769033	0.955391	0.00536252	1.38186	1.21713	1.56889	5.91252e-07	2559	0.464025	0.275844	-0.188181
Side_Effect_Nausea ≥ 4	0.737101	0.461409	1.17752	0.201857	0.218708	0.171607	0.278737	0	0.882151	0.789763	0.985346	0.0263137	0.52293	0.408346	0.669667	2.7835e-07	1.15595	0.940173	1.42125	0.169202	2560	0.189369	0.138417	-0.0509515
WishMoreTrt	0.807888	0.598636	1.09028	0.163065	0.419053	0.336798	0.521396	6.10623e-15	0.923098	0.891376	0.955948	7.28503e-06	1.006	0.89351	1.13265	0.921226	1.21782	1.04542	1.41864	0.0113935	2551	0.462143	0.366948	-0.0951948
WishMoreTrt (no outliers)	0.628451	0.535748	0.737195	1.16642e-08	0.364317	0.297879	0.445572	0	0.912012	0.871912	0.953957	5.95339e-05	0.996436	0.860127	1.15435	0.962062	1.3111	1.13059	1.52044	0.000338231	2268	0.41734	0.257717	-0.159623
	processes
	project phase [phase 2]				intercept					Predicted Risk
	RR	lowerCI	upperCI	p	RR	lowerCI	upperCI	p	n	phase 1	phase 2	difference
Intra_op_wound_infiltration	1.55172	0.929914	2.58931	0.0925975	0.274452	0.175032	0.430344	1.76022e-08	2596	0.274452	0.425873	0.151421
intra_op_regional_Anaes	1.39437	0.987216	1.96944	0.0591644	0.405373	0.275599	0.596256	4.50638e-06	2647	0.405373	0.56524	0.159866
ReceivedTrtinfo	1.76205	1.5683	1.97973	0	0.438027	0.388097	0.49438	0	2633	0.438027	0.771824	0.333797
painMsmnt	1.13175	1.01918	1.25676	0.0205931	0.838246	0.728432	0.964615	0.0137831	2517	0.838246	0.948688	0.110442
ward_non_opioid	1.0426	0.996863	1.09043	0.0683491	0.932894	0.890605	0.977191	0.00333739	2645	0.932894	0.972631	0.039737
wardOPIOIDsystemic	1.14896	0.691858	1.90807	0.591569	0.359513	0.243104	0.531662	2.97984e-07	2636	0.359513	0.413066	0.0535536
Non_pharmaceutical	0.975353	0.660726	1.4398	0.900053	0.209142	0.180126	0.242832	0	2636	0.209142	0.203987	-0.00515477

## Sheet: S-5 Association-Models
Level of evaluation	variable		independent variable				intercept				ages (standardized)				sex				pre-existing pain
	dependent	independent	beta	lowerCI	upperCI	p	beta	lowerCI	upperCI	p	beta	lowerCI	upperCI	p	beta	lowerCI	upperCI	p	beta	lowerCI	upperCI	p	n
Patient	worst pain ≥ 6	ioWinfl	0.901574	0.755292	1.07619	0.25133	0.471067	0.377751	0.587434	2.33846e-11	0.92343	0.871555	0.978392	0.0069226	0.877872	0.812391	0.94863	0.000989824	1.21536	1.04995	1.40683	0.00897341	2550
	worst pain ≥ 6	REGA	0.765928	0.631868	0.928432	0.0065988	0.505546	0.418135	0.61123	1.88549e-12	0.931317	0.881377	0.984086	0.0113902	0.89683	0.834753	0.963523	0.00292653	1.20736	1.05299	1.38436	0.00693959	2599
	worst pain ≥ 6	oTrtinfo	0.762677	0.642872	0.904809	0.00188799	0.527479	0.439886	0.632513	5.05729e-12	0.921183	0.868457	0.977109	0.00633232	0.875826	0.813456	0.942979	0.00043535	1.21991	1.07348	1.38631	0.00231287	2585
	worst pain ≥ 6	painMsmnt	0.942926	0.78047	1.1392	0.542424	0.466214	0.352654	0.616341	8.41792e-08	0.925289	0.874579	0.978939	0.00692938	0.902174	0.835808	0.97381	0.00827161	1.22696	1.06092	1.41898	0.00583181	2475
	worst pain ≥ 6	ioNONOPIOID	0.943427	0.775108	1.1483	0.561351	0.478204	0.361329	0.632883	2.47673e-07	0.920604	0.870025	0.974122	0.0041124	0.880313	0.816159	0.949511	0.000960163	1.2122	1.05089	1.39827	0.00825855	2605
	worst pain ≥ 6	ioNopioNSAID	0.852806	0.7381	0.985338	0.030741	0.50169	0.43299	0.58129	0	0.915431	0.865388	0.968369	0.00206556	0.87127	0.815438	0.930924	4.53485e-05	1.21164	1.05753	1.38821	0.00567788	2605
	worst pain ≥ 6	ioNopioMtmzl	1.18205	1.01019	1.38315	0.0369316	0.438339	0.359726	0.534132	3.33067e-16	0.921177	0.871868	0.973274	0.00344299	0.882355	0.81869	0.950972	0.00105406	1.21125	1.04968	1.39769	0.00869677	2605
	worst pain ≥ 6	ioNopioPrctml	0.998963	0.766746	1.30151	0.993865	0.453164	0.344452	0.596187	1.55264e-08	0.920745	0.870366	0.974039	0.00402459	0.880646	0.81736	0.948832	0.000836558	1.21113	1.0502	1.39671	0.00845256	2605
	worst pain ≥ 6	wNopio	0.792058	0.563664	1.113	0.179216	0.560843	0.373651	0.841816	0.00525398	0.92184	0.871619	0.974955	0.0044077	0.883556	0.819924	0.952125	0.00116832	1.22167	1.06227	1.40499	0.00500196	2596
	worst pain ≥ 6	wOpiolanaeOPIOIDsys	1.03411	0.865022	1.23626	0.712696	0.445406	0.352301	0.563118	1.38189e-11	0.923052	0.874365	0.97445	0.00377728	0.884563	0.821774	0.95215	0.00109371	1.21814	1.0615	1.39788	0.00495562	2587
	worst pain ≥ 6	wCombi	1.02908	0.862134	1.22836	0.750926	0.4438	0.349735	0.563165	2.3153e-11	0.922897	0.874239	0.974264	0.00369062	0.885139	0.821685	0.953492	0.00130521	1.2254	1.06685	1.40751	0.00403623	2581
	worst pain ≥ 6	oNm	1.05228	0.931493	1.18874	0.412668	0.447019	0.367633	0.543546	6.66134e-16	0.92151	0.87092	0.975039	0.00454748	0.881658	0.818879	0.94925	0.000831896	1.21474	1.05411	1.39985	0.00718269	2593
Ward	worst pain ≥ 6	ioWinfl_Cperc	0.802936	0.467911	1.37784	0.425661	0.488586	0.366855	0.650709	9.62689e-07	0.92392	0.8708	0.980281	0.008813	0.87987	0.815791	0.948982	0.00090881	1.21741	1.0587	1.39993	0.00577459	2608
	worst pain ≥ 6	REGA_Cperc	0.475145	0.3252	0.694229	0.000119837	0.64136	0.531938	0.77329	3.25818e-06	0.934804	0.882468	0.990244	0.0218187	0.861551	0.80758	0.919129	6.3333e-06	1.21341	1.07725	1.36678	0.00144557	2608
	worst pain ≥ 6	oTrtinfo_Cperc	0.398755	0.178062	0.892976	0.0254048	0.767839	0.508541	1.15935	0.20888	0.926183	0.872131	0.983585	0.0124369	0.874331	0.823014	0.928847	1.35009e-05	1.21339	1.07944	1.36397	0.00119225	2608
	worst pain ≥ 6	painMsmnt_Cperc	0.548469	0.353635	0.850645	0.00730886	0.772101	0.530555	1.12361	0.176651	0.926991	0.874516	0.982615	0.0107759	0.870093	0.810978	0.933516	0.000105966	1.20685	1.0517	1.3849	0.00740662	2608
Ward	worst pain ≥ 6	ioNONOPIOID_Cperc	0.0166905	0.00173523	0.160539	0.000394388	20.6488	2.64019	161.494	0.00391222	0.923174	0.871306	0.97813	0.00673771	0.872121	0.814528	0.933786	8.65798e-05	1.20518	1.05851	1.37218	0.00482024	2608
	worst pain ≥ 6	ioNopioNSAID_Cperc	0.517377	0.239398	1.11814	0.093737	0.682494	0.431676	1.07905	0.102157	0.923691	0.873046	0.977273	0.00579665	0.881697	0.820804	0.947108	0.000564049	1.20782	1.05815	1.37866	0.00515303	2608
	worst pain ≥ 6	ioNopioMtmzl_Cperc	2.16901	1.42827	3.29391	0.000280952	0.395191	0.320777	0.486868	0	0.922189	0.872771	0.974405	0.00394265	0.880395	0.816953	0.948764	0.000842768	1.19347	1.02779	1.38586	0.0203721	2608
	worst pain ≥ 6	ioNopioPrctml_Cperc	0.949976	0.463001	1.94914	0.888697	0.463504	0.29594	0.725944	0.000781744	0.920853	0.871187	0.97335	0.00355838	0.880663	0.816511	0.949855	0.000990589	1.21266	1.05173	1.39821	0.00794637	2608
	worst pain ≥ 6	wNopio_Cperc	0.164216	0.0337967	0.797914	0.0250971	2.53428	0.629195	10.2076	0.190804	0.922906	0.871254	0.977619	0.00632729	0.880788	0.818113	0.948265	0.000750345	1.20379	1.05498	1.37358	0.00586738	2608
	worst pain ≥ 6	wOpiolanaeOPIOIDsys_Cperc	0.985561	0.459922	2.11195	0.970164	0.455592	0.298343	0.695722	0.000272982	0.921374	0.870977	0.974688	0.00432659	0.880036	0.817031	0.947899	0.000746891	1.21326	1.06205	1.38599	0.00441996	2608
	worst pain ≥ 6	wCombi_Cperc	0.946215	0.432633	2.06948	0.889873	0.462422	0.304245	0.702837	0.000305095	0.921492	0.871032	0.974876	0.00443323	0.88023	0.817041	0.948307	0.000789371	1.2148	1.06198	1.38962	0.00455919	2608
	worst pain ≥ 6	oNm_Cperc	1.28192	0.321881	5.10533	0.724655	0.430201	0.299924	0.617068	4.57994e-06	0.92192	0.87189	0.974821	0.00429233	0.881437	0.819929	0.947559	0.000627239	1.21216	1.05124	1.39772	0.00810525	2608
Patient	Time_severe_pain ≥ 30%	ioWinfl	1.02647	0.849725	1.23997	0.786431	0.465886	0.369928	0.586736	8.51729e-11	0.930431	0.889165	0.973611	0.00183652	0.966874	0.908775	1.02869	0.286673	1.17153	1.00772	1.36198	0.0393972	2542
	Time_severe_pain ≥ 30%	REGA	0.841414	0.717707	0.986444	0.033319	0.510336	0.428053	0.608437	6.43929e-14	0.935152	0.894786	0.977338	0.00289934	0.972	0.909048	1.03931	0.405789	1.15708	0.999256	1.33984	0.0511692	2591
	Time_severe_pain ≥ 30%	oTrtinfo	0.704721	0.613578	0.809402	7.32244e-07	0.576329	0.487358	0.681542	1.18301e-10	0.927959	0.881946	0.976373	0.00395814	0.960232	0.905125	1.0187	0.178384	1.16939	1.02896	1.32899	0.0165135	2577
	Time_severe_pain ≥ 30%	painMsmnt	0.888164	0.771432	1.02256	0.0990046	0.521485	0.425255	0.63949	3.95748e-10	0.939908	0.897235	0.984611	0.00894335	0.970038	0.910536	1.03343	0.346255	1.1769	1.00885	1.37295	0.0382569	2467
	Time_severe_pain ≥ 30%	ioNONOPIOID	0.886495	0.719463	1.09231	0.258012	0.530606	0.417655	0.674105	2.11184e-07	0.93013	0.887905	0.974362	0.00224529	0.960897	0.90426	1.02108	0.198125	1.17117	1.01378	1.353	0.0318887	2597
	Time_severe_pain ≥ 30%	ioNopioNSAID	0.884181	0.781148	1.0008	0.0515007	0.51429	0.450912	0.586577	0	0.926455	0.885246	0.969583	0.000999611	0.954064	0.906439	1.00419	0.0718796	1.1687	1.01594	1.34442	0.0291607	2597
	Time_severe_pain ≥ 30%	ioNopioMtmzl	1.0535	0.957614	1.15898	0.28443	0.469663	0.38509	0.57281	8.60423e-14	0.93067	0.888239	0.975128	0.00254512	0.961849	0.904884	1.0224	0.211739	1.16903	1.01208	1.35032	0.0337333	2597
	Time_severe_pain ≥ 30%	ioNopioPrctml	1.07868	0.854101	1.36231	0.524847	0.458456	0.360191	0.58353	2.34853e-10	0.93137	0.889575	0.975128	0.0024038	0.962178	0.90591	1.02194	0.209813	1.16675	1.00962	1.34834	0.0366421	2597
	Time_severe_pain ≥ 30%	wNopio	0.685515	0.554363	0.847696	0.000491948	0.6747	0.520104	0.875247	0.00304092	0.930818	0.888971	0.974635	0.00225252	0.963691	0.908605	1.02212	0.218118	1.17733	1.02362	1.35412	0.0221914	2588
	Time_severe_pain ≥ 30%	wOpiolanaeOPIOIDsys	1.07638	0.92806	1.24841	0.330537	0.461326	0.365023	0.583037	9.41129e-11	0.93204	0.891197	0.974754	0.00208096	0.963877	0.907985	1.02321	0.227367	1.16399	1.00707	1.34537	0.0398458	2579
	Time_severe_pain ≥ 30%	wCombi	1.05293	0.911424	1.2164	0.483663	0.462826	0.366215	0.584922	1.12281e-10	0.931898	0.890494	0.975227	0.00235138	0.964636	0.907847	1.02498	0.244799	1.17156	1.01205	1.35621	0.0339775	2573
	Time_severe_pain ≥ 30%	oNm	1.14483	0.972753	1.34734	0.103616	0.461178	0.373604	0.56928	5.86531e-13	0.93517	0.892703	0.979657	0.00470157	0.962616	0.906149	1.0226	0.216696	1.16033	1.00351	1.34165	0.04472	2585
Ward	Time_severe_pain ≥ 30%	ioWinfl_Cperc	0.984395	0.551791	1.75616	0.95753	0.477391	0.345773	0.659109	7.0196e-06	0.931694	0.889447	0.975947	0.00280487	0.96226	0.906893	1.02101	0.20322	1.16959	1.01601	1.34638	0.0291751	2600
	Time_severe_pain ≥ 30%	REGA_Cperc	0.532023	0.277694	1.01928	0.0571147	0.641609	0.519772	0.792005	3.62241e-05	0.940291	0.900504	0.981835	0.00525364	0.945236	0.896033	0.99714	0.0389233	1.16178	1.01881	1.32482	0.0252144	2600
	Time_severe_pain ≥ 30%	oTrtinfo_Cperc	0.251619	0.120365	0.526002	0.000244791	1.03636	0.754266	1.42396	0.825615	0.937037	0.897462	0.978356	0.00313809	0.957011	0.905707	1.01122	0.118042	1.16809	1.04591	1.30454	0.00584595	2600
	Time_severe_pain ≥ 30%	painMsmnt_Cperc	0.674444	0.304372	1.49447	0.331916	0.674655	0.356932	1.2752	0.22567	0.935412	0.891116	0.981911	0.00698625	0.956439	0.904272	1.01162	0.119612	1.16441	1.00925	1.34343	0.0369606	2600
Ward	Time_severe_pain ≥ 30%	ioNONOPIOID_Cperc	0.0149355	0.000909499	0.245265	0.00323703	24.2869	1.93842	304.298	0.013393	0.934615	0.890643	0.980758	0.00595559	0.956861	0.904313	1.01246	0.125972	1.16108	1.02021	1.3214	0.023624	2600
	Time_severe_pain ≥ 30%	ioNopioNSAID_Cperc	0.59509	0.229455	1.54336	0.285751	0.660575	0.399738	1.09161	0.105671	0.933108	0.890673	0.977565	0.00355089	0.962183	0.911789	1.01536	0.160163	1.16635	1.01767	1.33674	0.0269782	2600
	Time_severe_pain ≥ 30%	ioNopioMtmzl_Cperc	1.53692	0.821407	2.87571	0.178777	0.441395	0.347663	0.560398	1.88032e-11	0.93197	0.889736	0.97621	0.0029051	0.960952	0.90632	1.01888	0.182266	1.16175	1.00105	1.34826	0.0484045	2600
	Time_severe_pain ≥ 30%	ioNopioPrctml_Cperc	1.28352	0.423411	3.89083	0.659115	0.425578	0.241267	0.75069	0.0031744	0.932999	0.892169	0.975698	0.00238473	0.964078	0.917544	1.01297	0.147236	1.16714	1.01553	1.34138	0.0294711	2600
	Time_severe_pain ≥ 30%	wNopio_Cperc	0.0378298	0.00869228	0.164639	1.2756e-05	10.8067	3.05386	38.2414	0.000222959	0.936084	0.892133	0.982201	0.00710369	0.968367	0.915504	1.02428	0.261732	1.1471	1.0045	1.30993	0.0427276	2600
	Time_severe_pain ≥ 30%	wOpiolanaeOPIOIDsys_Cperc	0.969268	0.437605	2.14687	0.938676	0.480198	0.306384	0.752621	0.00137628	0.931548	0.888817	0.976333	0.00307892	0.962593	0.906932	1.02167	0.209658	1.17062	1.02442	1.33768	0.0206439	2600
	Time_severe_pain ≥ 30%	wCombi_Cperc	0.902076	0.420955	1.93308	0.790994	0.492752	0.322465	0.752963	0.00106943	0.931692	0.888923	0.976519	0.00316694	0.963009	0.90657	1.02296	0.221234	1.17328	1.02425	1.34398	0.0211241	2600
	Time_severe_pain ≥ 30%	oNm_Cperc	1.64782	0.294814	9.21024	0.569453	0.426672	0.282687	0.643995	5.00985e-05	0.932306	0.890188	0.976417	0.00296037	0.966071	0.916363	1.01848	0.200284	1.16755	1.00823	1.35205	0.0384977	2600
Patient	Intefer_pain_activity_bed ≥ 4	ioWinfl	0.946717	0.803157	1.11594	0.514015	0.413187	0.323689	0.527429	1.27953e-12	0.937775	0.887795	0.990568	0.0214973	0.885818	0.769626	1.01955	0.0910093	1.2624	1.08673	1.46647	0.00230369	2544
	Intefer_pain_activity_bed ≥ 4	REGA	0.805812	0.684003	0.949313	0.0098203	0.443216	0.359253	0.546801	3.11973e-14	0.944359	0.894978	0.996465	0.0366859	0.907785	0.783532	1.05174	0.197658	1.26038	1.08942	1.45816	0.0018603	2593
	Intefer_pain_activity_bed ≥ 4	oTrtinfo	0.769008	0.657732	0.899111	0.000989224	0.472828	0.399908	0.559044	0	0.931708	0.883837	0.982171	0.00857606	0.887	0.774013	1.01648	0.084553	1.25867	1.11037	1.42678	0.000322006	2579
	Intefer_pain_activity_bed ≥ 4	painMsmnt	0.842916	0.674868	1.05281	0.131972	0.465969	0.354206	0.612996	4.82266e-08	0.933229	0.888005	0.980757	0.00639765	0.902766	0.783158	1.04064	0.158349	1.2705	1.09784	1.47032	0.00131545	2469
	Intefer_pain_activity_bed ≥ 4	ioNONOPIOID	0.868425	0.736256	1.02432	0.0939839	0.460785	0.347074	0.61175	8.37644e-08	0.934169	0.885295	0.985742	0.0129991	0.89548	0.778665	1.02982	0.121629	1.26726	1.10063	1.45913	0.000991303	2599
	Intefer_pain_activity_bed ≥ 4	ioNopioNSAID	0.903555	0.806065	1.01284	0.0816728	0.432142	0.3555	0.525307	0	0.931048	0.882529	0.982235	0.00888472	0.890303	0.779308	1.01711	0.0872026	1.26366	1.10211	1.44889	0.000799022	2599
	Intefer_pain_activity_bed ≥ 4	ioNopioMtmzl	1.01894	0.87513	1.18638	0.809006	0.402679	0.320296	0.506252	6.77236e-15	0.934775	0.885893	0.986355	0.0138403	0.896597	0.779507	1.03127	0.126341	1.26491	1.09944	1.45528	0.00101875	2599
	Intefer_pain_activity_bed ≥ 4	ioNopioPrctml	0.966638	0.785421	1.18967	0.748703	0.410142	0.306116	0.54952	2.35377e-09	0.934302	0.885242	0.98608	0.0135356	0.896532	0.779643	1.03095	0.125425	1.26594	1.0996	1.45745	0.00103419	2599
	Intefer_pain_activity_bed ≥ 4	wNopio	1.04676	0.828246	1.32291	0.702074	0.383591	0.252484	0.582777	7.10711e-06	0.932848	0.883808	0.984608	0.0116363	0.898934	0.781375	1.03418	0.136222	1.27624	1.10517	1.47379	0.00089437	2590
	Intefer_pain_activity_bed ≥ 4	wOpiolanaeOPIOIDsys	1.26291	1.02893	1.55011	0.025563	0.366573	0.27833	0.482793	9.16489e-13	0.933524	0.889004	0.980274	0.00579524	0.898969	0.787157	1.02666	0.11602	1.26368	1.10432	1.44602	0.000666711	2581
	Intefer_pain_activity_bed ≥ 4	wCombi	1.25084	1.02374	1.52831	0.0285555	0.366427	0.278063	0.482873	9.98313e-13	0.934034	0.889323	0.980993	0.00639533	0.900199	0.78702	1.02966	0.125103	1.27362	1.11017	1.46114	0.000557803	2575
	Intefer_pain_activity_bed ≥ 4	oNm	1.2139	1.01385	1.45341	0.0348821	0.388094	0.305871	0.49242	6.55032e-15	0.939825	0.890306	0.992099	0.0246251	0.897101	0.776819	1.03601	0.139302	1.25602	1.08621	1.45238	0.00209885	2587
Ward	Intefer_pain_activity_bed ≥ 4	ioWinfl_Cperc	0.814993	0.494559	1.34304	0.422137	0.433977	0.31271	0.602272	5.95935e-07	0.937915	0.887073	0.991672	0.0241903	0.895863	0.779111	1.03011	0.122686	1.27145	1.0994	1.47043	0.0012059	2602
	Intefer_pain_activity_bed ≥ 4	REGA_Cperc	0.479548	0.291873	0.787901	0.00371974	0.571338	0.458115	0.712543	6.77652e-07	0.947502	0.897989	0.999745	0.0489189	0.876564	0.775586	0.990689	0.0348745	1.26001	1.09677	1.44754	0.00109527	2602
	Intefer_pain_activity_bed ≥ 4	oTrtinfo_Cperc	0.381362	0.197601	0.736015	0.00405713	0.707241	0.524909	0.952907	0.0227796	0.939395	0.887997	0.993768	0.0294226	0.888707	0.777376	1.01598	0.0840242	1.26257	1.11746	1.42653	0.000181908	2602
	Intefer_pain_activity_bed ≥ 4	painMsmnt_Cperc	0.428157	0.240663	0.761722	0.00390171	0.857176	0.549492	1.33715	0.496936	0.94432	0.894107	0.997352	0.0398696	0.879637	0.768553	1.00678	0.0626109	1.25703	1.0927	1.44608	0.00137321	2602
Ward	Intefer_pain_activity_bed ≥ 4	ioNONOPIOID_Cperc	0.00741368	0.000969237	0.0567071	2.30493e-06	39.5064	6.45918	241.633	6.91967e-05	0.937292	0.892464	0.984372	0.00959914	0.885142	0.776729	1.00869	0.0672129	1.25041	1.09107	1.43302	0.0013127	2602
	Intefer_pain_activity_bed ≥ 4	ioNopioNSAID_Cperc	0.507945	0.21678	1.19019	0.118942	0.617633	0.371792	1.02603	0.0627785	0.939166	0.890487	0.990506	0.0208162	0.896563	0.786442	1.0221	0.102465	1.26362	1.10147	1.44965	0.00083985	2602
	Intefer_pain_activity_bed ≥ 4	ioNopioMtmzl_Cperc	2.03317	1.27736	3.23619	0.00276917	0.356335	0.287645	0.441428	0	0.937598	0.888853	0.989016	0.0180067	0.895599	0.778686	1.03007	0.122359	1.25344	1.07733	1.45834	0.00345229	2602
	Intefer_pain_activity_bed ≥ 4	ioNopioPrctml_Cperc	0.858651	0.445448	1.65514	0.649019	0.432826	0.271586	0.689793	0.000428666	0.934796	0.886095	0.986174	0.013511	0.896899	0.782403	1.02815	0.118387	1.26793	1.09491	1.46829	0.0015174	2602
	Intefer_pain_activity_bed ≥ 4	wNopio_Cperc	0.0362563	0.0125573	0.104682	8.68942e-10	9.66497	3.82114	24.446	1.65573e-06	0.938765	0.890338	0.989826	0.0193643	0.895622	0.786484	1.0199	0.0963675	1.23956	1.09535	1.40276	0.000665956	2602
	Intefer_pain_activity_bed ≥ 4	wOpiolanaeOPIOIDsys_Cperc	1.27838	0.640531	2.5514	0.486076	0.367892	0.236114	0.573215	9.892e-06	0.935048	0.888422	0.984121	0.0100723	0.89575	0.783371	1.02425	0.107474	1.25696	1.1032	1.43215	0.000591772	2602
	Intefer_pain_activity_bed ≥ 4	wCombi_Cperc	1.20476	0.617024	2.35232	0.58531	0.376792	0.24604	0.57703	7.16599e-06	0.935202	0.888152	0.984745	0.0109692	0.896195	0.782747	1.02609	0.112492	1.26045	1.1019	1.4418	0.000738712	2602
	Intefer_pain_activity_bed ≥ 4	oNm_Cperc	1.36249	0.311212	5.96503	0.681381	0.378733	0.250265	0.573146	4.36488e-06	0.936254	0.887911	0.987229	0.0148843	0.898341	0.786626	1.02592	0.113586	1.26626	1.09793	1.4604	0.00117955	2602
Patient	Intefer_pain_breath_cough ≥ 4	ioWinfl	0.967687	0.775277	1.20785	0.77151	0.304279	0.230654	0.401406	0	0.872073	0.812536	0.935972	0.0001482	0.882185	0.740533	1.05093	0.160409	1.25684	1.06123	1.48851	0.00808578	2547
	Intefer_pain_breath_cough ≥ 4	REGA	0.724724	0.554805	0.946684	0.0181795	0.336381	0.258981	0.436912	3.33067e-16	0.876876	0.818645	0.93925	0.000178481	0.908331	0.768658	1.07338	0.259034	1.24505	1.03223	1.50175	0.0219268	2596
	Intefer_pain_breath_cough ≥ 4	oTrtinfo	0.759637	0.637337	0.905405	0.00214385	0.352773	0.284806	0.436958	0	0.868311	0.804988	0.936615	0.000257209	0.884339	0.751237	1.04102	0.1397	1.25798	1.0756	1.4713	0.00408005	2582
	Intefer_pain_breath_cough ≥ 4	painMsmnt	0.774191	0.586058	1.02272	0.0715694	0.36495	0.263546	0.505372	1.28698e-09	0.868845	0.809128	0.932969	0.000108936	0.914383	0.773446	1.081	0.294627	1.28985	1.08484	1.53361	0.00395068	2472
	Intefer_pain_breath_cough ≥ 4	ioNONOPIOID	0.867846	0.734872	1.02488	0.0948466	0.341113	0.232629	0.500187	3.6415e-08	0.866359	0.80307	0.934636	0.000210076	0.889499	0.749208	1.05606	0.181175	1.25532	1.05239	1.49737	0.011483	2602
	Intefer_pain_breath_cough ≥ 4	ioNopioNSAID	0.907387	0.798245	1.03145	0.137177	0.318776	0.248731	0.408547	0	0.863623	0.80308	0.928731	7.69241e-05	0.883786	0.747423	1.04503	0.148489	1.25187	1.05134	1.49066	0.0116655	2602
	Intefer_pain_breath_cough ≥ 4	ioNopioMtmzl	1.02659	0.883733	1.19255	0.731365	0.297243	0.224401	0.39373	0	0.867033	0.803639	0.935428	0.000230407	0.889932	0.749645	1.05647	0.182749	1.25338	1.05117	1.49449	0.0118721	2602
	Intefer_pain_breath_cough ≥ 4	ioNopioPrctml	1.02675	0.795043	1.32599	0.839663	0.295025	0.20442	0.425787	6.96682e-11	0.867119	0.803034	0.936319	0.000272967	0.890813	0.752263	1.05488	0.180067	1.25252	1.0547	1.48744	0.010253	2602
	Intefer_pain_breath_cough ≥ 4	wNopio	0.895433	0.65509	1.22395	0.488528	0.329443	0.198931	0.545581	1.60182e-05	0.864227	0.800945	0.932509	0.000169183	0.897575	0.7587	1.06187	0.207667	1.26283	1.05226	1.51554	0.0121657	2593
	Intefer_pain_breath_cough ≥ 4	wOpiolanaeOPIOIDsys	1.19832	0.943579	1.52184	0.13788	0.276246	0.206889	0.368855	0	0.867351	0.806953	0.93227	0.000111345	0.897569	0.761279	1.05826	0.198405	1.25069	1.03812	1.50679	0.0185928	2584
	Intefer_pain_breath_cough ≥ 4	wCombi	1.18084	0.94428	1.47666	0.14502	0.277303	0.208174	0.369387	0	0.866268	0.804705	0.932542	0.000135152	0.900735	0.764112	1.06179	0.212887	1.2563	1.04046	1.51693	0.0176763	2578
	Intefer_pain_breath_cough ≥ 4	oNm	1.30001	1.0316	1.63827	0.0261735	0.281317	0.211274	0.374582	0	0.871364	0.809863	0.937534	0.000226698	0.900392	0.75645	1.07172	0.237759	1.24666	1.05211	1.47719	0.010873	2590
Ward	Intefer_pain_breath_cough ≥ 4	ioWinfl_Cperc	1.06568	0.700279	1.62175	0.766509	0.292428	0.20907	0.409021	6.87228e-13	0.868323	0.805527	0.936014	0.000227349	0.892946	0.755633	1.05521	0.183801	1.25379	1.0529	1.49301	0.0111285	2605
	Intefer_pain_breath_cough ≥ 4	REGA_Cperc	0.468442	0.26107	0.84053	0.0110087	0.417247	0.323955	0.537403	1.29137e-11	0.8781	0.81556	0.945437	0.000563912	0.877044	0.749831	1.02584	0.100815	1.24568	1.04366	1.48682	0.0149623	2605
	Intefer_pain_breath_cough ≥ 4	oTrtinfo_Cperc	0.421887	0.19606	0.907827	0.0272908	0.497139	0.342923	0.720709	0.000225495	0.873239	0.808219	0.943491	0.000595949	0.883934	0.753536	1.0369	0.129758	1.24769	1.07077	1.45384	0.0045629	2605
	Intefer_pain_breath_cough ≥ 4	painMsmnt_Cperc	0.53907	0.27263	1.0659	0.0756487	0.521561	0.30142	0.902484	0.0199778	0.874513	0.807928	0.946585	0.000904679	0.881764	0.748376	1.03893	0.132669	1.24364	1.04227	1.48392	0.0155479	2605
Ward	Intefer_pain_breath_cough ≥ 4	ioNONOPIOID_Cperc	0.0105417	0.000730472	0.152131	0.000829995	21.8014	2.07801	228.729	0.0101733	0.874535	0.811209	0.942804	0.000472747	0.882247	0.7551	1.0308	0.114591	1.23404	1.05325	1.44588	0.00927312	2605
	Intefer_pain_breath_cough ≥ 4	ioNopioNSAID_Cperc	0.543692	0.225306	1.312	0.175157	0.441045	0.262444	0.74119	0.0019961	0.871129	0.806438	0.94101	0.000457673	0.89126	0.761044	1.04376	0.153133	1.24697	1.04727	1.48475	0.0131853	2605
	Intefer_pain_breath_cough ≥ 4	ioNopioMtmzl_Cperc	1.82105	1.15562	2.86964	0.0097845	0.269022	0.197358	0.366708	1.11022e-16	0.870665	0.807315	0.938985	0.000326381	0.887469	0.752538	1.04659	0.155967	1.2452	1.03526	1.4977	0.0199173	2605
	Intefer_pain_breath_cough ≥ 4	ioNopioPrctml_Cperc	1.11936	0.441875	2.83555	0.812062	0.283688	0.149535	0.538196	0.000115123	0.869421	0.80453	0.939546	0.000406769	0.895068	0.768426	1.04258	0.154375	1.25455	1.05068	1.49797	0.0121958	2605
	Intefer_pain_breath_cough ≥ 4	wNopio_Cperc	0.0191935	0.00724078	0.0508772	1.88738e-15	13.0606	5.9943	28.4568	9.99781e-11	0.873885	0.811089	0.941544	0.000395362	0.898119	0.766813	1.05191	0.182708	1.22985	1.05885	1.42847	0.006756	2605
	Intefer_pain_breath_cough ≥ 4	wOpiolanaeOPIOIDsys_Cperc	1.54592	0.813396	2.93812	0.183649	0.252224	0.167004	0.380932	5.82918e-11	0.868037	0.804825	0.936215	0.000243922	0.894097	0.761508	1.04977	0.171662	1.23681	1.04456	1.46445	0.0136718	2605
	Intefer_pain_breath_cough ≥ 4	wCombi_Cperc	1.45534	0.790017	2.68098	0.228654	0.258979	0.174145	0.385141	2.51823e-11	0.868161	0.804833	0.936473	0.000253778	0.893864	0.760365	1.0508	0.173973	1.24119	1.04497	1.47426	0.0138542	2605
	Intefer_pain_breath_cough ≥ 4	oNm_Cperc	1.43408	0.254333	8.08619	0.682876	0.277501	0.162562	0.473706	2.62067e-06	0.869557	0.805221	0.939034	0.000365341	0.894614	0.762199	1.05003	0.172997	1.25399	1.04809	1.50035	0.0133878	2605
Patient	Intefer_pain_sleep ≥ 4	ioWinfl	0.867215	0.673686	1.11634	0.268814	0.224212	0.170701	0.294498	0	0.913215	0.861348	0.968204	0.00234133	0.948959	0.85383	1.05469	0.331008	1.4656	1.26622	1.69638	2.9943e-07	2542
	Intefer_pain_sleep ≥ 4	REGA	0.822021	0.681457	0.991579	0.0405222	0.235372	0.194197	0.285278	0	0.914513	0.867777	0.963767	0.000840924	0.96893	0.876002	1.07172	0.539494	1.43369	1.26076	1.63034	3.94687e-08	2592
	Intefer_pain_sleep ≥ 4	oTrtinfo	0.652768	0.527275	0.808127	9.01231e-05	0.275555	0.221787	0.342358	0	0.901973	0.850948	0.956059	0.000515806	0.94928	0.859701	1.04819	0.303354	1.44627	1.29577	1.61424	4.64777e-11	2578
	Intefer_pain_sleep ≥ 4	painMsmnt	0.73575	0.611061	0.885881	0.00119959	0.288606	0.233929	0.356063	0	0.910895	0.859271	0.965621	0.00171702	0.968284	0.872627	1.07443	0.543652	1.43226	1.25717	1.63175	6.66398e-08	2467
	Intefer_pain_sleep ≥ 4	ioNONOPIOID	0.769311	0.624941	0.947033	0.0133905	0.276964	0.199222	0.385043	2.20934e-14	0.906993	0.857347	0.959515	0.000676498	0.955241	0.863853	1.0563	0.37212	1.441	1.26589	1.64032	3.2604e-08	2597
	Intefer_pain_sleep ≥ 4	ioNopioNSAID	0.785722	0.653557	0.944613	0.0102764	0.253797	0.209069	0.308093	0	0.900895	0.851603	0.953041	0.0002776	0.940676	0.861716	1.02687	0.171565	1.43569	1.27066	1.62215	6.4405e-09	2597
	Intefer_pain_sleep ≥ 4	ioNopioMtmzl	1.11638	0.942079	1.32293	0.20369	0.212745	0.169571	0.266911	0	0.908817	0.859538	0.960921	0.000775273	0.957199	0.866347	1.05758	0.389935	1.43717	1.26267	1.63579	3.98953e-08	2597
	Intefer_pain_sleep ≥ 4	ioNopioPrctml	1.00733	0.742134	1.3673	0.962615	0.216581	0.159498	0.294093	0	0.908392	0.858452	0.961238	0.000867433	0.956405	0.863455	1.05936	0.392827	1.43619	1.26021	1.63674	5.69778e-08	2597
	Intefer_pain_sleep ≥ 4	wNopio	1.0531	0.698138	1.58855	0.80514	0.205876	0.127321	0.332899	1.14786e-10	0.907937	0.859913	0.958643	0.000495222	0.955732	0.863086	1.05832	0.384111	1.44717	1.26939	1.64986	3.26177e-08	2588
	Intefer_pain_sleep ≥ 4	wOpiolanaeOPIOIDsys	1.15555	0.884703	1.50932	0.288689	0.204801	0.157272	0.266692	0	0.905948	0.858336	0.956201	0.000335727	0.958931	0.869088	1.05806	0.403424	1.44307	1.26612	1.64475	3.90062e-08	2579
	Intefer_pain_sleep ≥ 4	wCombi	1.12566	0.858931	1.47522	0.39095	0.207261	0.160293	0.267991	0	0.907626	0.860805	0.956994	0.000334857	0.956365	0.863887	1.05874	0.389856	1.44812	1.26867	1.65296	4.12421e-08	2573
	Intefer_pain_sleep ≥ 4	oNm	1.30722	1.06057	1.61124	0.0120319	0.204603	0.163273	0.256395	0	0.913563	0.863123	0.96695	0.00180941	0.959994	0.867479	1.06238	0.42972	1.42336	1.24528	1.6269	2.25743e-07	2585
Ward	Intefer_pain_sleep ≥ 4	ioWinfl_Cperc	0.737565	0.416557	1.30595	0.296359	0.240106	0.170512	0.338103	3.33067e-16	0.912114	0.858524	0.969048	0.00290387	0.960877	0.867522	1.06428	0.444073	1.45289	1.27861	1.65092	1.00498e-08	2600
	Intefer_pain_sleep ≥ 4	REGA_Cperc	0.461285	0.306427	0.694403	0.000209261	0.310774	0.25827	0.373951	0	0.923612	0.869984	0.980544	0.00921992	0.936711	0.866708	1.01237	0.0989767	1.44651	1.28471	1.62868	1.06208e-09	2600
	Intefer_pain_sleep ≥ 4	oTrtinfo_Cperc	0.323483	0.152726	0.685156	0.00320392	0.411827	0.277233	0.611766	1.114e-05	0.914492	0.860525	0.971844	0.00397344	0.955056	0.873358	1.0444	0.3135	1.45763	1.29772	1.63724	2.07225e-10	2600
	Intefer_pain_sleep ≥ 4	painMsmnt_Cperc	0.427779	0.271981	0.672822	0.000237812	0.460489	0.320767	0.661073	2.62705e-05	0.918204	0.862647	0.97734	0.00736691	0.941185	0.859026	1.0312	0.193361	1.43588	1.2672	1.62701	1.39319e-08	2600
Ward	Intefer_pain_sleep ≥ 4	ioNONOPIOID_Cperc	0.00869567	0.000654407	0.115547	0.00032423	18.0622	1.7005	191.851	0.0163775	0.911017	0.858	0.967311	0.00231552	0.952696	0.866279	1.04773	0.317867	1.44103	1.27278	1.63152	8.02643e-09	2600
	Intefer_pain_sleep ≥ 4	ioNopioNSAID_Cperc	0.497505	0.215991	1.14594	0.101004	0.334476	0.201285	0.555801	2.36999e-05	0.912281	0.861002	0.966615	0.00186831	0.961014	0.876296	1.05392	0.398339	1.44208	1.27547	1.63045	5.08092e-09	2600
	Intefer_pain_sleep ≥ 4	ioNopioMtmzl_Cperc	2.36438	1.32301	4.22544	0.00367344	0.185775	0.147144	0.234549	0	0.910474	0.860819	0.962994	0.00104595	0.960634	0.868502	1.06254	0.434946	1.41589	1.23716	1.62044	4.39066e-07	2600
	Intefer_pain_sleep ≥ 4	ioNopioPrctml_Cperc	0.781048	0.45835	1.33094	0.363498	0.241016	0.164522	0.353075	2.78999e-13	0.905723	0.855567	0.958819	0.000657261	0.964159	0.865134	1.07452	0.509174	1.44315	1.26405	1.64764	5.76896e-08	2600
	Intefer_pain_sleep ≥ 4	wNopio_Cperc	0.148054	0.0379152	0.578131	0.00598848	1.34191	0.400434	4.49692	0.633605	0.910496	0.858879	0.965215	0.00163822	0.961549	0.870176	1.06252	0.441492	1.43429	1.27038	1.61936	5.70618e-09	2600
	Intefer_pain_sleep ≥ 4	wOpiolanaeOPIOIDsys_Cperc	0.840478	0.35335	1.99916	0.694253	0.230851	0.143619	0.371068	1.41245e-09	0.908906	0.859055	0.961651	0.000904358	0.961474	0.868868	1.06395	0.44705	1.45306	1.29019	1.63649	7.24081e-10	2600
	Intefer_pain_sleep ≥ 4	wCombi_Cperc	0.79424	0.330885	1.90646	0.606089	0.23545	0.148391	0.373587	8.23854e-10	0.909061	0.859161	0.96186	0.000932946	0.961527	0.868383	1.06466	0.450434	1.45468	1.28948	1.64104	1.10228e-09	2600
	Intefer_pain_sleep ≥ 4	oNm_Cperc	1.66352	0.519246	5.32946	0.391588	0.193985	0.141271	0.266368	0	0.909819	0.858882	0.963777	0.00130377	0.964515	0.874064	1.06433	0.47206	1.44567	1.26974	1.64598	2.58835e-08	2600
Patient	Composite	ioWinfl	0.877315	0.705044	1.09168	0.240577	0.354101	0.272676	0.459841	6.88338e-15	0.900987	0.842046	0.964055	0.00252353	0.870172	0.761585	0.994241	0.0408616	1.39281	1.16754	1.66155	0.000232452	2542
	Composite	REGA	0.753206	0.617595	0.918594	0.00513573	0.38022	0.303408	0.476478	0	0.907063	0.847667	0.970621	0.00475749	0.89195	0.787356	1.01044	0.072363	1.38485	1.17187	1.63653	0.00013257	2591
	Composite	oTrtinfo	0.67532	0.563178	0.809793	2.26372e-05	0.421542	0.346282	0.513159	0	0.894815	0.835076	0.958827	0.00161778	0.868326	0.761646	0.989947	0.0347665	1.39486	1.19859	1.62329	1.69956e-05	2577
	Composite	painMsmnt	0.918794	0.724874	1.16459	0.483787	0.355819	0.259277	0.48831	1.56802e-10	0.899447	0.841915	0.96091	0.00167595	0.900907	0.787191	1.03105	0.129565	1.40744	1.17858	1.68074	0.000160147	2467
	Composite	ioNONOPIOID	0.847935	0.692321	1.03853	0.110811	0.394958	0.290912	0.536216	2.60053e-09	0.896058	0.83764	0.95855	0.00141898	0.875264	0.769116	0.996061	0.0434012	1.39216	1.17345	1.65164	0.000148087	2597
	Composite	ioNopioNSAID	0.8327	0.707677	0.979811	0.0274035	0.381021	0.317214	0.457663	0	0.89106	0.833294	0.952831	0.000743683	0.865048	0.769746	0.97215	0.0149211	1.3892	1.18162	1.63323	6.85759e-05	2597
	Composite	ioNopioMtmzl	1.15612	1.00699	1.32734	0.039513	0.329432	0.261753	0.41461	0	0.896825	0.839584	0.957969	0.00121187	0.877118	0.771712	0.996921	0.044728	1.38781	1.16983	1.64641	0.000170384	2597
	Composite	ioNopioPrctml	0.975854	0.771743	1.23395	0.83823	0.342395	0.258867	0.452874	5.82867e-14	0.895976	0.837694	0.958314	0.00137056	0.876468	0.770702	0.996747	0.0444678	1.38904	1.17006	1.64901	0.000173827	2597
	Composite	wNopio	1.00283	0.871376	1.15412	0.968523	0.334672	0.246269	0.45481	2.66109e-12	0.895611	0.836444	0.958965	0.0015691	0.880691	0.772687	1.00379	0.0569981	1.40337	1.17935	1.66994	0.000133908	2588
	Composite	wOpiolanaeOPIOIDsys	1.10569	0.863319	1.41609	0.426144	0.324352	0.242412	0.43399	3.4972e-14	0.896416	0.840147	0.956453	0.000945942	0.880784	0.775174	1.00078	0.0514166	1.3968	1.18113	1.65186	9.40486e-05	2579
	Composite	wCombi	1.08796	0.853254	1.38724	0.496504	0.324509	0.242324	0.434567	4.24105e-14	0.895877	0.839404	0.95615	0.000933613	0.881771	0.775113	1.00311	0.0557661	1.4081	1.18915	1.66736	7.21275e-05	2573
	Composite	oNm	1.1375	0.932705	1.38727	0.203331	0.329961	0.25778	0.422353	0	0.90075	0.841589	0.96407	0.002564	0.875803	0.767841	0.998946	0.0481879	1.38783	1.1732	1.64173	0.000131599	2585
Ward	Composite	ioWinfl_Cperc	0.811728	0.438728	1.50185	0.506392	0.364889	0.259004	0.514061	8.15937e-09	0.899883	0.839126	0.965038	0.00309815	0.874925	0.769845	0.994349	0.0406761	1.39461	1.17542	1.65466	0.000137437	2600
	Composite	REGA_Cperc	0.448556	0.296854	0.677782	0.000140838	0.492114	0.399167	0.606704	3.15978e-11	0.913631	0.850152	0.98185	0.0139509	0.852445	0.764061	0.951052	0.00425457	1.39357	1.20327	1.61396	9.41833e-06	2600
	Composite	oTrtinfo_Cperc	0.2991	0.134227	0.666493	0.00315233	0.674236	0.451912	1.00593	0.0534808	0.903181	0.838464	0.972894	0.00726556	0.864818	0.772004	0.96879	0.0121622	1.3962	1.21796	1.60052	1.66961e-06	2600
	Composite	painMsmnt_Cperc	0.482817	0.299233	0.779032	0.00285439	0.646906	0.431762	0.969257	0.0347406	0.904431	0.843053	0.970278	0.00508614	0.860362	0.760544	0.973281	0.0168279	1.3826	1.17138	1.63191	0.000128053	2600
Ward	Composite	ioNONOPIOID_Cperc	0.00479747	0.000389899	0.05903	3.05011e-05	49.5258	5.14463	476.771	0.000731008	0.900722	0.840243	0.965554	0.00319353	0.858347	0.759713	0.969786	0.0141822	1.38014	1.18218	1.61125	4.52877e-05	2600
	Composite	ioNopioNSAID_Cperc	0.479452	0.18537	1.24008	0.129471	0.535025	0.308012	0.929353	0.0264142	0.901234	0.841941	0.964702	0.00274483	0.876536	0.775463	0.990783	0.0350199	1.38555	1.18205	1.62408	5.72813e-05	2600
	Composite	ioNopioMtmzl_Cperc	2.04141	1.18611	3.51344	0.00999104	0.299626	0.23999	0.37408	0	0.8981	0.840373	0.959792	0.0015206	0.874568	0.768862	0.994807	0.0414277	1.36512	1.13507	1.64181	0.000947919	2600
	Composite	ioNopioPrctml_Cperc	0.873214	0.467392	1.6314	0.670723	0.360266	0.23272	0.557716	4.67541e-06	0.895683	0.837973	0.957367	0.0011862	0.87713	0.770159	0.998959	0.0481894	1.38881	1.16326	1.65809	0.000280687	2600
	Composite	wNopio_Cperc	0.101064	0.0267617	0.381662	0.000722791	3.02786	0.943662	9.71528	0.0625309	0.90021	0.840226	0.964477	0.00280772	0.873795	0.767556	0.994738	0.0413737	1.37783	1.17408	1.61695	8.65479e-05	2600
	Composite	wOpiolanaeOPIOIDsys_Cperc	1.06542	0.451482	2.51422	0.884977	0.330972	0.199593	0.548829	1.82632e-05	0.897494	0.840301	0.95858	0.00128565	0.875387	0.770482	0.994576	0.0410013	1.38771	1.18202	1.6292	6.25302e-05	2600
	Composite	wCombi_Cperc	1.00951	0.42169	2.41671	0.983053	0.337906	0.205659	0.555192	1.84611e-05	0.897637	0.84024	0.958954	0.00135919	0.875618	0.770415	0.995188	0.0419652	1.39025	1.18093	1.63667	7.5753e-05	2600
	Composite	oNm_Cperc	1.16388	0.236126	5.73687	0.852074	0.328343	0.216041	0.499024	1.84108e-07	0.898039	0.840009	0.960078	0.00160298	0.876831	0.773654	0.993768	0.0396021	1.39089	1.17259	1.64982	0.000151926	2600
Patient	Side_Effect_Nausea ≥ 4	ioWinfl	0.925704	0.744066	1.15168	0.488468	0.19488	0.14619	0.259785	0	0.867133	0.774339	0.971046	0.0135566	0.528417	0.409358	0.682105	9.72474e-07	1.16367	0.94647	1.43073	0.150415	2543
	Side_Effect_Nausea ≥ 4	REGA	0.766123	0.550002	1.06717	0.115131	0.208327	0.15565	0.278832	0	0.886695	0.801547	0.980887	0.0195619	0.533681	0.407477	0.698973	5.07559e-06	1.19182	0.958465	1.48199	0.114468	2592
	Side_Effect_Nausea ≥ 4	oTrtinfo	0.899498	0.615159	1.31526	0.584803	0.200516	0.148794	0.270217	0	0.870151	0.780445	0.970168	0.0122253	0.520912	0.402034	0.674941	8.03491e-07	1.17104	0.947926	1.44667	0.143167	2581
	Side_Effect_Nausea ≥ 4	painMsmnt	0.78453	0.484059	1.27151	0.324626	0.218375	0.149212	0.319596	4.88498e-15	0.851205	0.75298	0.962244	0.0100178	0.551341	0.426996	0.711897	4.97033e-06	1.2206	0.975302	1.5276	0.0815917	2469
	Side_Effect_Nausea ≥ 4	ioNONOPIOID	0.84549	0.647884	1.10337	0.216548	0.218442	0.142966	0.333764	2.01317e-12	0.868243	0.777192	0.969961	0.0124333	0.521258	0.398166	0.682402	2.13235e-06	1.17815	0.961225	1.44403	0.114314	2598
	Side_Effect_Nausea ≥ 4	ioNopioNSAID	1.0148	0.826692	1.24572	0.888281	0.185065	0.138766	0.246812	0	0.86934	0.777857	0.971584	0.0135814	0.52304	0.400135	0.683697	2.11256e-06	1.17573	0.958531	1.44215	0.120289	2598
	Side_Effect_Nausea ≥ 4	ioNopioMtmzl	1.13493	0.956648	1.34644	0.146589	0.182626	0.138773	0.240337	0	0.868699	0.776975	0.971251	0.013422	0.521915	0.400412	0.680287	1.51532e-06	1.17493	0.957631	1.44154	0.12233	2598
	Side_Effect_Nausea ≥ 4	ioNopioPrctml	0.86105	0.605973	1.2235	0.403924	0.200218	0.14306	0.280213	0	0.865558	0.77298	0.969223	0.0123621	0.519055	0.397601	0.677609	1.42381e-06	1.17257	0.953058	1.44263	0.132233	2598
	Side_Effect_Nausea ≥ 4	wNopio	1.42046	0.834491	2.4179	0.195907	0.13299	0.0725696	0.243716	6.66119e-11	0.870932	0.779125	0.973556	0.0150336	0.529856	0.41214	0.681195	7.23516e-07	1.1819	0.953799	1.46456	0.126605	2590
	Side_Effect_Nausea ≥ 4	wOpiolanaeOPIOIDsys	1.35105	1.03617	1.7616	0.0262501	0.162448	0.119175	0.221434	0	0.870192	0.780934	0.969652	0.0117977	0.531175	0.415316	0.679355	4.66319e-07	1.19443	0.961549	1.4837	0.108352	2580
	Side_Effect_Nausea ≥ 4	wCombi	1.35818	1.04531	1.76468	0.0219194	0.16277	0.119752	0.22124	0	0.87205	0.783097	0.971107	0.0126273	0.532114	0.415966	0.680693	5.12708e-07	1.19497	0.961852	1.4846	0.107676	2575
	Side_Effect_Nausea ≥ 4	oNm	1.19833	0.952383	1.50779	0.122654	0.178767	0.133981	0.238523	0	0.875348	0.783101	0.978462	0.019118	0.527567	0.404057	0.68883	2.61112e-06	1.18281	0.956559	1.46258	0.121145	2586
Ward	Side_Effect_Nausea ≥ 4	ioWinfl_Cperc	0.707451	0.31591	1.58427	0.400135	0.210417	0.137599	0.321768	6.35936e-13	0.875227	0.785807	0.974823	0.0153613	0.522494	0.40223	0.678716	1.15152e-06	1.18606	0.956182	1.47121	0.120573	2601
	Side_Effect_Nausea ≥ 4	REGA_Cperc	0.45042	0.236486	0.857884	0.0152531	0.268611	0.179961	0.400932	1.25503e-10	0.893991	0.804777	0.993094	0.0366907	0.518562	0.405585	0.663009	1.62347e-07	1.21523	0.960959	1.53678	0.103628	2601
	Side_Effect_Nausea ≥ 4	oTrtinfo_Cperc	0.742572	0.249056	2.21401	0.593341	0.22449	0.12917	0.39015	1.17215e-07	0.873738	0.780835	0.977695	0.0186081	0.519188	0.398752	0.675999	1.128e-06	1.17292	0.948868	1.44987	0.14029	2601
	Side_Effect_Nausea ≥ 4	painMsmnt_Cperc	0.300853	0.188693	0.479681	4.49849e-07	0.550524	0.350757	0.864065	0.0094514	0.878867	0.791684	0.97565	0.0154149	0.503919	0.382245	0.664323	1.16985e-06	1.15573	0.935381	1.42799	0.179905	2601
Ward	Side_Effect_Nausea ≥ 4	ioNONOPIOID_Cperc	0.000880373	8.07058e-05	0.00960349	7.90159e-09	132.522	17.1683	1022.93	2.77717e-06	0.866955	0.78136	0.961925	0.00710398	0.502093	0.383086	0.658069	5.98502e-07	1.12917	0.915851	1.39217	0.255469	2601
	Side_Effect_Nausea ≥ 4	ioNopioNSAID_Cperc	0.337608	0.14024	0.812745	0.0154112	0.36841	0.203056	0.668416	0.00101829	0.877935	0.787257	0.979058	0.0192572	0.519847	0.403305	0.670066	4.38431e-07	1.16233	0.922354	1.46474	0.202328	2601
	Side_Effect_Nausea ≥ 4	ioNopioMtmzl_Cperc	4.66122	2.58779	8.39594	2.9469e-07	0.143554	0.110117	0.187145	0	0.87325	0.784143	0.972481	0.0135809	0.513887	0.397824	0.66381	3.44553e-07	1.12207	0.911602	1.38114	0.277148	2601
	Side_Effect_Nausea ≥ 4	ioNopioPrctml_Cperc	0.854765	0.396131	1.8444	0.689206	0.201941	0.120976	0.337091	9.37985e-10	0.870541	0.776581	0.975869	0.0173509	0.520792	0.404005	0.671339	4.75818e-07	1.17597	0.941848	1.46829	0.152413	2601
	Side_Effect_Nausea ≥ 4	wNopio_Cperc	0.0146146	0.00439716	0.0485735	5.35061e-12	10.464	3.49167	31.3592	2.75413e-05	0.872581	0.783373	0.971947	0.0132448	0.518496	0.402072	0.668632	4.1406e-07	1.14486	0.933315	1.40435	0.194323	2601
	Side_Effect_Nausea ≥ 4	wOpiolanaeOPIOIDsys_Cperc	1.68755	0.745145	3.82184	0.209603	0.151946	0.0929855	0.248294	5.4623e-14	0.873706	0.785224	0.972158	0.0131998	0.528662	0.411745	0.678777	5.78087e-07	1.17187	0.948919	1.4472	0.140743	2601
	Side_Effect_Nausea ≥ 4	wCombi_Cperc	1.62801	0.705604	3.75624	0.253234	0.15475	0.0950675	0.251899	6.08402e-14	0.873647	0.784781	0.972577	0.0135847	0.52835	0.411033	0.679151	6.3491e-07	1.17446	0.950552	1.45111	0.1362	2601
	Side_Effect_Nausea ≥ 4	oNm_Cperc	1.4398	0.197034	10.5212	0.719435	0.173794	0.100055	0.301879	5.24437e-10	0.873818	0.782189	0.976181	0.0170082	0.524844	0.410378	0.67124	2.81009e-07	1.1785	0.950113	1.4618	0.135074	2601
Patient	WishMoreTrt	ioWinfl	0.890645	0.740793	1.07081	0.217903	0.390824	0.275588	0.554245	1.35698e-07	0.922942	0.896498	0.950167	6.43055e-08	1.00556	0.884245	1.14352	0.932609	1.22074	1.012	1.47253	0.0370976	2532
	WishMoreTrt	REGA	0.819304	0.682137	0.984055	0.0330116	0.415261	0.304093	0.567069	3.22939e-08	0.924136	0.895971	0.953186	5.85006e-07	1.01322	0.895545	1.14636	0.834841	1.2002	1.00387	1.43494	0.0452481	2582
	WishMoreTrt	oTrtinfo	0.672008	0.539877	0.836477	0.000372903	0.468784	0.367016	0.598772	1.30003e-09	0.909126	0.874041	0.945619	2.08801e-06	1.00587	0.885125	1.14309	0.928484	1.20755	1.01852	1.43166	0.0299119	2578
	WishMoreTrt	painMsmnt	0.820535	0.655311	1.02742	0.084667	0.452716	0.362446	0.565469	2.85916e-12	0.932794	0.904155	0.962341	1.22743e-05	1.00642	0.884458	1.1452	0.922626	1.2129	1.01966	1.44274	0.0292614	2459
	WishMoreTrt	ioNONOPIOID	0.978717	0.755509	1.26787	0.870603	0.386598	0.290082	0.515226	8.85365e-11	0.91598	0.885579	0.947424	3.46355e-07	1.00139	0.882871	1.13581	0.982809	1.20374	0.998936	1.45054	0.051318	2587
	WishMoreTrt	ioNopioNSAID	0.93756	0.796154	1.10408	0.439543	0.395582	0.305977	0.511427	1.47349e-12	0.914043	0.881161	0.948153	1.52351e-06	0.99749	0.885167	1.12407	0.967114	1.20324	1.00317	1.44322	0.0461414	2587
	WishMoreTrt	ioNopioMtmzl	1.1319	0.979374	1.30819	0.0933893	0.371155	0.265476	0.518902	6.74211e-09	0.916575	0.886831	0.947317	2.2723e-07	1.00179	0.882335	1.13741	0.977996	1.20372	1.0015	1.44677	0.0481619	2587
	WishMoreTrt	ioNopioPrctml	0.806084	0.648182	1.00245	0.0526258	0.416938	0.289362	0.600761	2.67496e-06	0.913928	0.884348	0.944498	8.24872e-08	0.995212	0.874984	1.13196	0.941754	1.20578	1.00264	1.45009	0.0468158	2587
	WishMoreTrt	wNopio	1.06474	0.718236	1.57842	0.7548	0.356464	0.228104	0.557056	5.93298e-06	0.918523	0.888356	0.949715	6.09738e-07	1.00883	0.88614	1.1485	0.894333	1.20745	1.00285	1.45379	0.0465867	2579
	WishMoreTrt	wOpiolanaeOPIOIDsys	0.897024	0.778927	1.03303	0.131332	0.392534	0.277166	0.555924	1.38888e-07	0.917661	0.887851	0.948473	3.40122e-07	1.00411	0.882602	1.14235	0.950273	1.21312	1.00728	1.46101	0.0417042	2570
	WishMoreTrt	wCombi	0.90221	0.780151	1.04337	0.165263	0.39246	0.276475	0.557103	1.66705e-07	0.918063	0.888363	0.948757	3.48528e-07	1.00411	0.88288	1.14198	0.950207	1.21288	1.00908	1.45784	0.0397502	2565
	WishMoreTrt	oNm	1.03752	0.794819	1.35434	0.786445	0.374972	0.262436	0.535766	7.13752e-08	0.91547	0.885601	0.946346	1.80273e-07	1.00248	0.879792	1.14227	0.970361	1.21272	1.0181	1.44455	0.030699	2576
Ward	WishMoreTrt	ioWinfl_Cperc	0.573234	0.279168	1.17706	0.129543	0.449824	0.300617	0.673089	0.000102218	0.922359	0.888615	0.957385	2.13574e-05	0.997816	0.877515	1.13461	0.97339	1.21233	1.00741	1.45893	0.041534	2590
	WishMoreTrt	REGA_Cperc	0.53606	0.331241	0.867527	0.01113	0.515294	0.371092	0.715531	7.54342e-05	0.925295	0.89642	0.955101	1.58719e-06	0.994224	0.887828	1.11337	0.920099	1.19954	1.01987	1.41085	0.0279696	2590
	WishMoreTrt	oTrtinfo_Cperc	0.628328	0.260329	1.51653	0.301283	0.495729	0.348114	0.70594	9.99336e-05	0.918668	0.886748	0.951736	2.58017e-06	1.00759	0.892209	1.1379	0.902962	1.20885	1.01532	1.43927	0.0331066	2590
	WishMoreTrt	painMsmnt_Cperc	0.661535	0.353358	1.23848	0.196539	0.546025	0.348226	0.856179	0.00837436	0.920087	0.89004	0.951148	8.8012e-07	0.999335	0.880513	1.13419	0.991788	1.20127	1.00452	1.43656	0.0444941	2590
Ward	WishMoreTrt	ioNONOPIOID_Cperc	0.0947923	0.003113	2.88647	0.176439	3.38901	0.163308	70.3294	0.43021	0.917131	0.885581	0.949804	1.27602e-06	1.00173	0.880552	1.13958	0.979044	1.20341	1.00874	1.43564	0.0397229	2590
	WishMoreTrt	ioNopioNSAID_Cperc	0.812611	0.452898	1.45803	0.486607	0.432678	0.329818	0.567616	1.4576e-09	0.916286	0.885598	0.948037	4.89926e-07	1.00483	0.886913	1.13842	0.939697	1.20329	1.00748	1.43716	0.0411287	2590
	WishMoreTrt	ioNopioMtmzl_Cperc	1.9881	1.06162	3.72316	0.0318097	0.340784	0.227318	0.510885	1.87742e-07	0.918195	0.888048	0.949367	5.42695e-07	1.00254	0.88518	1.13545	0.968195	1.19292	0.994744	1.43058	0.0570217	2590
	WishMoreTrt	ioNopioPrctml_Cperc	0.33813	0.253346	0.451287	1.80966e-13	0.617233	0.443679	0.858677	0.0041761	0.913347	0.882514	0.945256	2.29962e-07	0.97837	0.866658	1.10448	0.723705	1.19094	0.99729	1.4222	0.053604	2590
	WishMoreTrt	wNopio_Cperc	5.59859	0.235345	133.184	0.286745	0.0746636	0.00469105	1.18836	0.0660959	0.91528	0.887112	0.944344	2.84769e-08	0.996508	0.879906	1.12856	0.956056	1.213	1.02548	1.43479	0.0242151	2590
	WishMoreTrt	wOpiolanaeOPIOIDsys_Cperc	0.454698	0.242242	0.853485	0.0141622	0.494465	0.312201	0.783138	0.00268266	0.915686	0.885651	0.946739	2.25917e-07	0.999424	0.878862	1.13652	0.992985	1.2247	1.01699	1.47483	0.0325404	2590
	WishMoreTrt	wCombi_Cperc	0.425376	0.228585	0.791587	0.0069846	0.503414	0.324121	0.781888	0.0022486	0.915786	0.886042	0.946528	1.76824e-07	0.998811	0.878681	1.13537	0.985484	1.22456	1.01722	1.47418	0.0323257	2590
	WishMoreTrt	oNm_Cperc	0.261221	0.0454103	1.50267	0.132635	0.494271	0.293981	0.831017	0.00785389	0.91478	0.888086	0.942277	3.74996e-09	0.987639	0.871195	1.11965	0.845921	1.212	1.01962	1.44068	0.0292325	2590
